1 **Title:** Attention-dependent coupling with forebrain and brainstem neuromodulatory  
2 nuclei changes across the lifespan

3  
4 **Abbreviated title:** Aging changes the coupling of deep brain nuclei

5  
6 **Author names and affiliations:** Nicholas G. Cicero<sup>1</sup>, Elizabeth Riley<sup>1</sup>, Khena M.  
7 Swallow<sup>1</sup>, Eve De Rosa<sup>1</sup>, Adam Anderson<sup>1</sup>. 1: Department of Psychology, Cornell  
8 University, Ithaca, NY 14853

9  
10 **Corresponding author email address:** [ngc26@cornell.edu](mailto:ngc26@cornell.edu)

11  
12 **Number of pages:** 42

13 **Number of figures:** 5

14 **Number of tables:** 0

15 **Number of multimedia:** 0

16 **Number of 3D models:** 0

17 **Numbers of words for abstract:** 226

18 **Number of words for introduction:** 650

19 **Number of words for discussion:** 1679

20  
21 **Conflict of interest statement:** The authors declare no competing financial interests.

22  
23 **Acknowledgements:** This work was supported by F32 AG058479 to ER and  
24 R01AG066430 to EDR and AKA. This research was carried out at the Cornell  
25 University Magnetic Resonance Imaging Facility within the Cornell Human  
26 Neuroscience Institute. Our experimental protocol was reviewed by the Cornell  
27 Institutional Review Board, protocol #1910009087. We thank Elizabeth Sharp, Love  
28 Nemecek, Julio Salas, and Elena Cabrera for assistance with data collection.

29 **Abstract**

30 Attentional states continuously reflect the predictability and uncertainty in one's  
31 environment having important consequences for learning and memory. Beyond well  
32 known cortical contributions, rapid shifts in attention are hypothesized to also originate  
33 from deep nuclei, such as the basal forebrain (BF) and locus coeruleus (LC)  
34 neuromodulatory systems. These systems are also the first to change with aging. Here  
35 we characterized the interplay between these systems and their regulation of afferent  
36 targets – the hippocampus (HPC) and posterior cingulate cortex (PCC) – across the  
37 lifespan. To examine the role of attentional salience on task-dependent functional  
38 connectivity, we used a target-distractor go/no go task presented during functional MRI.  
39 In younger adults, BF coupling with the HPC, and LC coupling with the PCC, increased  
40 with behavioral relevance (targets vs distractors). Although the strength and presence of  
41 significant regional coupling changed in middle age, the most striking change in network  
42 connectivity was in old age, such that in older adults BF and LC coupling with their cortical  
43 afferents was largely absent and replaced by stronger interconnectivity between LC-BF  
44 nuclei. Overall rapid changes in attention related to behavioral relevance revealed distinct  
45 roles of subcortical neuromodulatory systems. The pronounced changes in functional  
46 network architecture across the lifespan suggest a decrease in these distinct roles, with  
47 deafferentation of cholinergic and noradrenergic systems associated with a shift towards  
48 mutual support during attention guided to external stimuli.

49 **Significance statement**

50 Changes in attentional control across the lifespan may originate from cortical control  
51 networks or subcortical neuromodulatory systems, which are the first sites of age-related  
52 neuropathology. In young adults, we demonstrated functional coupling of the basal  
53 forebrain with the hippocampus, and locus coeruleus with the posterior cingulate cortex  
54 varies with task relevance. This coupling changed in middle age and most strikingly in  
55 older adults. In old age, task-dependent coupling between the locus coeruleus and basal  
56 forebrain was the predominant connection remaining within the observed network. Older  
57 adults exhibit reduced subcortical-cortical connectivity, consistent with a relative  
58 neuromodulatory deafferentation, replaced by subcortical-subcortical deep nuclear  
59 connectivity. This alteration in noradrenergic and cholinergic signaling has important  
60 implications for attention and memory formation and neurocognitive aging.

## 61 **Introduction**

62           To produce adaptive behavior, the brain balances the prioritization of goal-relevant  
63 information with the need to respond to changing environmental demands (Shine, 2019).  
64 Depending on the situation, systems that process task-relevant information may  
65 predominate or give way to systems that promote shifts in cognitive states (Sarter et al.,  
66 2001; Corbetta et al., 2008). For example, when driving towards a traffic light, a yellow  
67 light could signal a switch from maintaining a steady speed to assessing if you need to  
68 slow down. The flexibility to dynamically shift attentional states is vital for cognitive  
69 functioning (Chun & Turk-Browne, 2007).

70           Subcortical neuromodulatory systems are the foundation of short-term shifts in the  
71 tuning of flexible brain networks towards objects of attention (Berridge & Waterhouse,  
72 2003; Aston-Jones & Cohen, 2005). With distributed processes throughout the brain, the  
73 basal forebrain (BF) and locus coeruleus (LC) release neuromodulators, adjusting the  
74 responsivity of neurons without causing action potentials. The LC releases  
75 norepinephrine (NE) (Berridge & Waterhouse, 2003; Aston-Jones & Cohen, 2005) and  
76 the BF, which consists of four regions (Ch1-3 = medial septum (MS); Ch4 = Nucleus  
77 Basalis of Meynert (nbM)), releases acetylcholine (ACh). Both have prominent  
78 innervations in the posterior cingulate cortex (PCC) and hippocampus (HPC), which are  
79 involved in spatiotemporal representations of memory and internally-driven cognition,  
80 respectively (Levitt & Moore, 1978; Mesulam et al., 1983; Detari, Sembrano, & Rasmusson,  
81 1997; Espana & Berridge, 2006; Markello et al., 2018). HPC and PCC have significant  
82 functional connectivity with these neuromodulatory regions (Jacobs et al., 2018; Markello

83 et al., 2018; Turker et al., 2021). The release of NE and ACh thus contributes to the PCC  
84 and HPC's respective roles in cognition.

85       The LC and BF nuclei not only project to the HPC and PCC but are themselves  
86 strongly interconnected. The LC is the primary source of noradrenergic innervation to the  
87 nbM (Espana & Berridge, 2006) and show significant functional connectivity (Turker et  
88 al., 2021). NE and ACh have complementary roles in computing uncertainty in the  
89 environment, such that ACh signals expected uncertainty, suppressing expectation-  
90 driven information in environments with predictability (Yu & Dayan, 2005). In contrast, NE  
91 signals unexpected uncertainty in which sensory information violates top-down  
92 expectations. Additionally, NE flattens low-dimensional energy landscapes of cortical  
93 dynamics, reducing the difficulty of switching brain states, whereas ACh has the opposite  
94 effect by deepening these landscapes (Munn, Müller, Wainstein, & Shine, 2021). Overall,  
95 the LC and BF are synergistically connected and vital for cognitive flexibility.

96       Assessing these systems in a context where they naturally change provides an  
97 opportunity to observe variation in it. One such context is healthy aging, in which there  
98 are changes to attentional orienting (Madden & Langley, 2003), distractibility (Berti et al.,  
99 2013), and to the structural integrity of these neuromodulatory systems (Mather & Harley,  
100 2016). The LC and BF are some of the first regions to show evidence of pathology in  
101 aging (Weinshenker, 2008; Zarow et al., 2003; Liu et al., 2015; Beardmore et al., 2021;  
102 Dahl et al., 2021) and this likely creates cognitive vulnerabilities years prior to the  
103 development of cognitive impairment, as has been demonstrated in Alzheimer's Disease  
104 (Teipel et al., 2014; Kerbler et al., 2015; Jacobs et al., 2019; Dutt et al., 2020). Despite  
105 evidence of structural alterations in these neuromodulatory systems, it is unknown how

106 these regions function within a network and how network structure changes with age to  
107 impact attentional processing. Advances in magnetic resonance imaging (MRI) allow us  
108 to investigate these small nuclei in humans. Turbo-spin echo (TSE) imaging provides a  
109 technique for structural localization of the small LC region (Keren et al., 2009; Turker et  
110 al., 2021) and multi-echo fMRI has been demonstrated to obtain high signal in the BF and  
111 LC (Markello et al., 2018; Turker et al., 2021). We use these tools to assess the age-  
112 related changes in the interplay of the LC and BF nuclei and their regulation of the HPC  
113 and PCC during a go/no go task.

114

## 115 **Methods**

116 *Participants.* We examined 85 participants (36 younger adults, 14 middle-aged adults, 35  
117 older adults) who completed this task as a part of a larger study that included  
118 neuropsychological assessment, structural and functional MRI scans, and several other  
119 cognitive tasks. Pupillary data and analyses from the same participants have been  
120 previously published in Riley et al. (2023). MRI data was not available for 18 participants  
121 because they did not complete all of the task, the acquired data was unusable due to  
122 technical problems, or their functional data did not converge during the ME-ICA pipeline  
123 (see Section 2.5).

124

125 *Participant Characteristics.* Our ultimate dataset consisted of 30 younger (aged 19-45;  
126 average 25.16 years old; 64.5% female), 14 middle-aged adults (aged 46-65; average  
127 58.14 years old; 61.2% female) and 23 older adults (aged 66-86; average 70.48 years  
128 old; 50% female) for a final sample of 67 healthy adults. Participants were screened for

129 diagnosed cognitive impairment, neurological disease, head injury, ocular disease, and  
130 had vision and hearing that were normal or correctable-to-normal. Left-handed participants  
131 made up 6% of younger adults (2 participants), 14% of middle-aged adults (2 participants)  
132 and 8% of older adults (2 participants). Younger, middle-aged, and older adults had an  
133 average of 17.2y (SD = 3.1), 17.2y (SD = 3.1), and 17.5y (SD = 2.9) of education  
134 respectively. All participants were screened for cognitive impairment with the Montreal  
135 Cognitive Assessment. Younger adults had an average score of 27.9 (SD = 1.6, range  
136 25-30, zero below cutoff), middle-aged adults had an average score of 27.2 (SD = 1.9,  
137 range 25-30, one below cutoff), and older adults had an average score of 27.0 (SD = 2.4,  
138 range 25-30, four below the cutoff after adjustment for years of education). None had a  
139 diagnosis of cognitive impairment of any kind. Participants were also given the Trail  
140 Making Test Part B, with an average time of 70.3s (SD = 23.7, range 41-119) for younger  
141 adults, 81.7s (SD = 37.8, range 39-177) for middle-aged adults and 95.4s (SD = 24.0,  
142 range 50-151) for older adults. While older adults had slower times to completion, none  
143 were longer than the predefined cutoff of 180 seconds.

144         Any participants that used vision correction were either given MR-safe lenses  
145 during testing, or, if they only used vision correction for reading, were given a brief vision  
146 test before entering the scanner to ensure that they would be able to see the task stimuli  
147 in focus.

148  
149 *Task Overview.* Detailed descriptions of the task and stimuli are presented in Riley et al.  
150 (2023), but are recounted here for completeness. Participants were asked to remember  
151 a series of pictures for a later test while performing a go/no-go auditory discrimination

152 task. Participants listened for two types of tones (low and high) and responded by  
153 pressing a button for the target tone, but not the distractor tone. Participants completed  
154 4 blocks of the task with the identity of the target switching each time. Detecting a target  
155 in the task has previously been shown to engage brain regions involved in attentional  
156 orienting, including the LC facilitating the processing of concurrently presented events  
157 relative to both distractor and baseline conditions. The identification of a target has been  
158 shown to increase the attentional and memory salience for concurrently presented  
159 events, as well as elicit activity in the LC relative to both distractors and no tone  
160 conditions (Swallow & Jiang, 2010; Swallow & Jiang, 2014; for a review, see Swallow et  
161 al., 2022).

162

163 *Task Stimuli.* Tone stimuli were either high (1200 Hz) or low (400 Hz) and were 60 ms  
164 duration. Background visual stimuli were presented to maintain a consistent level of  
165 luminance and cognitive engagement across the testing session. They consisted of 144  
166 color pictures and were evenly divided among pictures of faces, objects, and scenes.  
167 We generated an additional 144 scrambled image masks derived from the source  
168 images. The images were acquired from online resources (Huang, Jang, & Learned-  
169 Miller, 2007; <http://vision.stanford.edu/projects/sceneclassification/resources.html>) and  
170 personal collections. Between trials, the scrambled masks were presented to maintain  
171 light stimulation and were created by dividing an image into 256 squares and randomly  
172 shuffling them. Pixel intensities, both mean and variance, were matched across images  
173 using the SHINE toolbox (Willenbockel et al., 2010).

174



175 *Task Procedure.* All participants performed the task as part of a longer MRI protocol. Each  
176 participant completed 4 blocks of 6 min 47 s each, for a total duration of less than 30 min,  
177 with brief breaks. On each 1.25 s long trial, one image ( $7 \times 7$  visual degrees;  $256 \times 256$   
178 pixels) was presented for 625 ms and immediately followed by a scrambled version of  
179 that same image for another 625 ms, and in some cases further scrambled images, also  
180 for 625ms. This timing, with no blank screen between trials, encouraged vigilance and  
181 rapid response times to help equate performance in younger and older participants.

182 On task trials (144 per block), participants first saw a picture and then a scrambled  
183 version of the same picture. Task trials were designated as target, distractor, or no tone  
184 trials in equal numbers. Participants were instructed that memory for the pictures would  
185 be tested later. Participants were asked to maintain fixation on a dot (0.25 visual degree  
186 diameter, red) at the center of the picture throughout the testing session. All 144 images  
187 were presented one time per block for a total of 4 repetitions across blocks and 576 total  
188 task trials. On task trials, either a high- or low-pitch or no tone played. Participants were  
189 told which was the target tone pitch, and this alternated across blocks, with the starting  
190 target tone counterbalanced across participants. When participants heard the specified  
191 target pitch for that run, participants pressed a button with their dominant hand pointer  
192 finger. Participants were instructed to make no motor response on trials with a distractor  
193 tone or no tone. Before the experiment, participants practiced the task. Tone volume was  
194 adjusted during a mock scan to ensure that participants were able to hear the tone over  
195 scanner noise. Tone sound level was always set to a standard to begin with and was  
196 raised only if participants were not able to discern the two different tones, with sound level  
197 ranging between 89% and 92% of maximum across participants.

198           From the perspective of the participant, there was a constant stream of scrambled  
199 images interspersed with intact pictures. Isoluminant changing and distinct background  
200 scrambled images, 164 per block without sound, were the majority of events to promote  
201 relatively constant low-level visual stimulation for pupil response measurement. These  
202 164 scrambled images were in addition to the 144 pictures associated with trials and the  
203 144 scrambled masks of each that followed it. The additional scrambled images also  
204 served to increase the unpredictability of the task trials. The median interval between true  
205 non-scrambled task trials was 2.5 s.

206           The go/no go task had a 3 × 6 design, with within-subject factors of tone type (no  
207 tone, distractor tone, target tone) and image type (female face, male face, beach, forest,  
208 car, chair); the latter included to examine potential image category effects. No tone trials  
209 were not examined in the analyses presented here. The trial sequence, specifically, the  
210 order and timing of each of the 18 trial types, was optimized using the AFNI function  
211 `make_random_timing` to produce sequences that maximized orthogonality of overlapping  
212 BOLD responses across trials and minimized the amount of unexplained variance in a  
213 simulated task. Inter-trial intervals were filled with scrambled images, as described above.

214  
215 *MRI Acquisition and Preprocessing.* Imaging was carried out at the Cornell University MRI  
216 Facility with a GE discovery MR750 3T scanner and a 32-channel head coil. Participants  
217 laid supine on the scanner bed with their head supported and stabilized. Ear plugs,  
218 headphones, and a microphone were used to reduce scanner noise, allow the participant  
219 to communicate with the experimenters, and to present auditory stimuli during the tasks.  
220 Visual stimuli were presented with a 32" Nordic Neuro Lab liquid crystal display (1920 ×

221 1080 pixels, 60 Hz, 6.5 ms g to g) located at the back of the scanner bore and viewed  
222 through a mirror attached to the head coil. Pulse oximetry and respiration were recorded  
223 throughout all scans.

224 The imaging protocol consisted of a multi-echo acquisition (TR = 2500; TEs = 12.3,  
225 26.0, and 40.0 ms; flip angle = 90°; matrix = 72 x 72; fov = 21 cm; slice thickness = 3.0  
226 mm) and a structural T1-weighted MPRAGE (TR/TE = 7/3.42 ms; flip angle = 7°; matrix  
227 = 256 x 256; fov = 24 cm; slice thickness = 1 mm isotropic voxels). High resolution images  
228 of the LC were acquired with neuromelanin sensitive T1-weighted turbo-spin echo (TSE)  
229 structural scans (scan resolution = 512 x 512 mm; fov = 22.0 mm x 132.00 mm; TE =  
230 11.26 ms; TR = 700 ms; flip angle = 120°). Visual stimuli were presented on a screen with  
231 a mirror, auditory stimuli were presented to participants via headphones, and participants  
232 responded to various tasks in the scanner by pressing a button box. Participants  
233 subsequently completed additional anatomical and functional scans that will be reported  
234 separately.

235 Preprocessing of the structural MRI images included normalization, skull stripping,  
236 segmentation, and spatial smoothing. Before preprocessing, EPI data was warped to MNI  
237 space. Processing of the multi-echo EPI data was performed using a preprocessing  
238 pipeline from AFNI (afni\_procy.py; tedana.py, Version 2.4 beta 11) with the following  
239 blocks used: despike, tshift, align, tlrc, volreg, mask, combine, and scale (Taylor et al.,  
240 2018). Echo combination was completed using AFNI's multi-echo ICA script (tedana.py,  
241 version 0.0.12). After preprocessing, the EPI data was spatially blurred (to 6 mm FWHM).  
242 This minimal amount of blurring has been shown to not critically change the ability to

243 isolate LC activity (Turker et al., 2021). Quality control checks were completed at each  
244 stage in preprocessing to ensure accurate completion of each step.

245  
246 *MRI Processing: Regions of Interest.* LC ROIs were created for each participant from their  
247 neuromelanin sensitive TSE scan as described in Turker et al. (2021). The ROIs for the  
248 BF were taken from a probabilistic ROI obtained from a previous study (Zaborszky et al.,  
249 2008). Separate BFs for BF Ch1-3 (MS) and BF Ch4 (nbM) were obtained. Both BF ROIs  
250 were warped to native N27 space and thresholded. Left and right hippocampal and left  
251 and right posterior cingulate cortical (PCC) ROIs for each participant were obtained from  
252 FreeSurfer's automatic parcellation. Volumes were reviewed for accuracy and masks  
253 were manually edited if necessary. After extraction, each participant's hippocampal and  
254 PCC ROIs were thresholded to eliminate occasional nonzero voxels introduced during  
255 the warping process. Probabilistic hippocampal and PCC ROIs were obtained by finding  
256 the union set of all participants' specific ROIs. ROIs in standard MNI space are shown in  
257 Figure 1. As hippocampal volume has shown to change with age, we ensured good  
258 overlap in hippocampal masks between each age group. The average hippocampal mask  
259 for each age group was formed and then the dice coefficient between all pairs of age  
260 groups was calculated to assess overlap between groups. All age group pairs showed  
261 good overlap in average hippocampal masks (young-middle: dice=0.751; young-old:  
262 dice=0.734; middle-old: dice=0.729).

263  
264 *MRI Processing: Task-Dependent Functional Connectivity.* To assess task-dependent  
265 functional connectivity between the LC, BF, and other target ROIs we conducted a

266 generalized psychophysiological interaction (gPPI) analysis. This analysis was used  
267 because of the three task conditions and rapid event-related design of our go/no go task  
268 (McLaren et al., 2012; O'Reilly et al., 2012; Harrison et al., 2017). gPPI allowed us to  
269 characterize changes in LC, nbM, and MS functional coupling with other areas as they  
270 relate to the three go/no go task trial conditions (1:target, 2:distractor, 3:no tone). Briefly,  
271 the beta series for the LC ROI was extracted using a least-squares-sum (LSS) estimation  
272 approach (3dLSS in AFNI), generating one beta per trial. Next, for gPPI analysis, the beta  
273 series across each participant's LC ROI was extracted (3dmaskave in AFNI). A canonical  
274 gamma hemodynamic response function (HRF) was convolved with the participant's  
275 target tone stimulus timing file as input. Then the LC beta series was deconvolved with  
276 the stimulus-specific gamma HRF (waver in AFNI). A stimulus coding file was then  
277 generated that was the length of the number of trials in a single run, but each time point  
278 was 1 if that trial was a target tone or 0 if that trial was a distractor tone or no tone. The  
279 interaction between the deconvolved LC beta series and the stimulus coding file was then  
280 assessed by multiplying the two files (1deval -expr 'a\*b' in AFNI). The interaction time  
281 series was then obtained by convolving the previous step's output with a canonical  
282 gamma HRF. The above steps were repeated for each participant's distractor trial time  
283 series separately, resulting in each participant having two separate interaction beta time  
284 series'. These interaction time series' were then entered into a general linear model with  
285 the LC beta series (3dDeconvolve in AFNI) and interaction term beta weights were  
286 extracted for each trial type. Interaction term beta weights (referred to as "gPPI parameter  
287 estimates" going forward), for each trial type are interpreted as that specific trial's task-  
288 dependent functional coupling for all voxels with the LC. The above steps were repeated

289 with the nbM and MS ROIs as seeds to generate attention-dependent functional  
290 connectivity estimates across all three subcortical and brainstem neuromodulatory  
291 regions.

292 We operationally define target-related connectivity as task-dependent functional  
293 connectivity (gPPI parameter estimates) that is greater during target relative to distractor  
294 trials and we define distractor-related connectivity as connectivity that is greater during  
295 distractor relative to target trials. These definitions are useful for quantifying how trial-by-  
296 trial connectivity between neuromodulatory regions and its afferents support these two  
297 different aspects of the go/no-go task.

298

299 *Statistical Analysis: Dummy Coding.* In analyses in which tone type (distractor or target)  
300 was a predictor of outcomes, distractors were coded as 1 and targets as 2. For age  
301 groups, younger adults were coded as 0, middle-aged adults as 1, and older adults as 2.

302

303 *Statistical Analysis: Models.* Several linear mixed effects models were completed in AFNI  
304 (3dLME) to assess gPPI parameter estimates in relation to several within- and between-  
305 subjects variables, while taking into account the random effect of subject. A linear mixed  
306 effects model was completed on the gPPI parameter estimates to assess changes in task-  
307 dependent functional coupling for each seed ROI in relation to trial type condition and age  
308 group. Cluster correction on the linear mixed effects results was completed to find the  
309 cluster size threshold (in voxels) and to find significant clusters (3dClusterize AFNI).  
310 Small-volume correction was completed using AFNI's 3dClustSim to compute a threshold  
311 for a voxelwise p-value given the surviving cluster size. Note that our linear mixed effects

312 results produce whole-brain voxelwise outputs, but we only report here results from our  
313 specific regions of interest.

314

## 315 **Results**

316 *LC-seeded network.*

317 To determine how LC functional connectivity with its known afferents changed across  
318 conditions and age groups in our go/no go task, a linear mixed effects model was used.  
319 GPPI interaction parameter estimates for each trial, by tone type and age group, and  
320 including their interaction (tone x age group), were entered into the model.

321

322 *LC-BF nucleus basalis of Meynert (nbM) functional connectivity.* Significant clusters in the  
323 nbM represented significant LC-nbM functional connectivity changes. There was a  
324 significant nbM cluster for the main effect of age group across all trial types (X,Y,Z = 28,  
325 -3, -12; cluster size = 16 voxels;  $F = 3.94$ ;  $p = 0.035$ ), but not for the main effect of trial  
326 type. There was a significant nbM cluster for the age-by-trial type interaction (X,Y,Z = -  
327 19, 8, -6; cluster size = 15 voxels;  $z = -2.33$ ;  $p = 0.04$ ), indicating a change in task-  
328 dependent LC-nbM coupling across age groups. The cluster that was significant for the  
329 age-by-trial type interaction did not overlap with the cluster significant for the main effect  
330 of age group, indicating two distinct nbM neuronal populations with coupling to the LC  
331 that changes across the lifespan.

332 To investigate the age-by-trial type interaction further, we extracted gPPI  
333 parameters from all subjects within the significant nbM cluster. We first computed one-  
334 sample t-tests within each age group to assess if task-dependent coupling within a given

335 age group was stronger in targets or distractors. We found that in younger adults the LC-  
336 nbM connectivity was marginally greater during distractors ( $t = -1.813$ ,  $p = 0.08$ ), in  
337 middle-aged adults was significantly greater during distractors ( $t = -3.67$ ,  $p = 0.0025$ ), and  
338 in older adults reversed to being significantly greater during targets ( $t = 2.43$ ,  $p = 0.022$ )  
339 (*Figure 2*). In comparing across age groups, LC-nbM coupling in older adults was  
340 significantly greater in targets versus distractors compared to younger and middle-aged  
341 adults ( $t = -3.13$ ,  $p = 0.002$ ;  $t = -3.44$ ,  $p = 0.001$ ). LC-nbM coupling was not significantly  
342 different between younger and middle-aged adults ( $t = 1.41$ ,  $p = 0.165$ ). The change in  
343 LC-nbM functional connectivity between targets and distractors had a marginally  
344 significant positive correlation with age ( $r = 0.228$ ,  $p = 0.056$ ). Task dependent LC-nbM  
345 coupling is ultimately greater during distractor trials in younger and middle-aged adults,  
346 but significantly changed in older adults.

347  
348 *LC-hippocampus (HPC) functional connectivity.* Significant clusters in the HPC represent  
349 significant LC-HPC functional connectivity changes across age group or trial type. There  
350 were no significant clusters in the HPC for the main effect of age nor the main effect of  
351 trial type. However, there was a significant HPC cluster for the trial type-by-age interaction  
352 ( $X, Y, Z = 34, 29, -9$ ; cluster size = 18 voxels;  $z = 2.96$ ;  $p = 0.017$ ).

353       Upon further investigation, LC-HPC in younger adults indicated marginal changes  
354 in connectivity across trial types, trending towards being greater during target trials ( $t =$   
355  $1.71$ ,  $p = 0.097$ ). In middle aged adults, connectivity was significantly greater during target  
356 trials ( $t = 2.31$ ,  $p = 0.036$ ), and in older adults was marginally greater during distractor  
357 trials ( $t = -1.91$ ,  $p = 0.067$ ). LC-HPC coupling for targets compared to distractors was



358 significantly weaker in older adults compared to younger ( $t = 2.38$ ,  $p = 0.020$ ) and middle-  
359 aged adults ( $t = 3.21$ ,  $p = 0.002$ ), with no significant difference between younger and  
360 middle-aged adults ( $t = -0.65$ ,  $p = 0.518$ ) (*Figure 2*). The change in LC-HPC functional  
361 connectivity between targets and distractors had a significant negative linear correlation  
362 with age ( $r = -0.248$ ,  $p = 0.038$ ). Task-dependent LC-HPC coupling was marginally greater  
363 during target trials in young and middle-aged adults, but significantly decreased in older  
364 adults to marginally support distractor processing instead.

365  
366 *LC-Posterior Cingulate Cortex (PCC)*. Significant clusters in the PCC represent significant  
367 LC-PCC functional connectivity changes. There were no significant clusters in the PCC  
368 for the main effect of age group nor for the main effect of trial type. There was a significant  
369 PCC cluster for the trial type-by-age interaction ( $X, Y, Z = -10, 57, 11$ ; cluster size = 46  
370 voxels;  $z = -2.41$ ;  $p = 0.036$ ).

371 One-sample t-tests revealed that in younger adults LC-PCC coupling was greater  
372 during distractor trials ( $t = -3.23$ ,  $p = 0.003$ ), whereas LC-PCC coupling in middle-aged  
373 and older adults was not significantly different across the two trial types ( $t = -1.657$ ,  $p =$   
374  $0.119$ ;  $t = 1.602$ ,  $p = 0.112$ ). LC-PCC coupling for targets compared to distractors was  
375 significantly greater in older adults compared to younger adults ( $t = -3.217$ ,  $p = 0.002$ )  
376 and compared to middle-aged adults ( $t = -3.446$ ,  $p = 0.0014$ ), with no reliable difference  
377 between younger and middle-aged adults ( $t = -0.74$ ,  $p = 0.463$ ) (*Figure 2*). The change in  
378 LC-PCC functional connectivity between targets and distractors had a significant positive  
379 linear correlation with age ( $r = 0.331$ ,  $p = 0.008$ ). The results overall indicate that LC-PCC

380 coupling was greater during distractor trials in younger adults, but no longer task-  
381 dependent by old age.

382         There was no significant LC-MS (BF Ch1-3) coupling for any main effects nor  
383 interactions. This aligns with previous literature indicating structural connections between  
384 the LC and nbM (España & Berridge, 2006), but not between the LC and MS. Overall,  
385 with the LC as a seed region, gPPI analysis revealed that across age LC coupling with  
386 the nbM, HPC, and PCC changed in a task-dependent manner. Namely, with age LC-  
387 nbM and LC-PCC functional coupling was greater during distractor trials in young and  
388 middle age but reversed in old age to support target trials. On the other hand, LC-HPC  
389 functional coupling was greater during target trials in young and middle age, but reversed  
390 to support distractor trials in old age. There are clear task-dependent changes in LC  
391 coupling with both subcortical and cortical regions that markedly change with age most  
392 strikingly later in life.

393

#### 394 *nbM-seeded network*

395 To determine how nbM functional connectivity with its known afferents changed across  
396 conditions and age groups in our go/no go task, a linear mixed effects model was used.  
397 GPPI parameter estimates for each trial, by tone type and age group, and including their  
398 interaction (tone x age group), were entered into the model.

399

400 *nbM-LC*. Significant clusters in the LC represent significant nbM-LC functional  
401 connectivity changes. There were no significant LC clusters for the main effect of age

402 group nor trial type, but there was a significant LC cluster for the trial type-by-age  
403 interaction ( $X, Y, Z = -4, 34, -27$ ; cluster size = 22 voxels;  $z = 2.776$ ;  $p = 0.034$ ).

404 One-sample t-tests revealed that in younger adults, LC-nbM connectivity did not  
405 depend on trial type ( $t = 1.369$ ,  $p = 0.181$ ) (*Figure 3*). However, in middle-aged adults,  
406 nbM-LC coupling was stronger during targets ( $t = 2.181$ ,  $p = 0.0466$ ). In older adults nbM-  
407 LC coupling reversed and was actually stronger during distractor trials ( $t = -3.694$ ,  $p =$   
408  $0.0012$ ). nbM-LC coupling between targets and distractors was greater in younger and  
409 middle-aged adults compared to older adults ( $t = 3.495$ ,  $p = 0.0009$ ;  $t = 3.827$ ,  $p = 0.0004$ ).  
410 Additionally, middle-aged adults had marginally greater nbM-LC coupling compared to  
411 younger adults ( $t = -1.944$ ,  $p = 0.058$ ). The change in LC-nbM functional connectivity  
412 between targets and distractors did not have a significant linear correlation with age ( $r =$   
413  $-0.138$ ,  $p = 0.255$ ). However, when testing for any quadratic effects there was a significant  
414 curvilinear relationship between nbM-HPC functional connectivity with age ( $p = 0.005$ ).  
415 Task-dependent nbM-LC coupling, with nbM as the seed, was stronger during target trials  
416 in middle age but strongly reversed in old age to be greater during distractor trials. Of  
417 note, we observe differences in nbM-LC coupling between all pairs of the three age  
418 groups, indicating strong sensitivity of task-dependent nbM-LC coupling to age.

419  
420 *nbM-HPC*. Significant clusters in the HPC represented significant nbM-HPC functional  
421 connectivity changes. There were significant bilateral HPC clusters for the main effect of  
422 trial type group across all age groups (*left HPC*:  $X, Y, Z = 43, 26, -12$ ; cluster size = 20  
423 voxels;  $F = 5.901$ ;  $p = 0.0142$ ; *right HPC*:  $X, Y, Z = -31, 23, -9$ ; cluster size = 29 voxels;  $F$   
424  $= 7.214$ ;  $p = 0.009$ ), suggesting that nbM coupling with the left and right HPC is related to

425 rapid changes according to trial type. Additionally, there was a significant HPC cluster for  
426 the main effect of age group ( $X, Y, Z = 23, 32, -13$ ; cluster size = 38 voxels;  $F = 3.54$ ;  $p =$   
427  $0.045$ ), indicating that task-dependent nbM-HPC coupling changes across the lifespan.  
428 Finally, there was a significant HPC cluster in the left hemisphere for the trial type-by-age  
429 interaction ( $X, Y, Z = 31, 23, -9$ ; cluster size = 95 voxels;  $z = 3.153$ ;  $p = 0.0153$ ).

430       Upon further investigation, nbM-HPC coupling was significantly greater during  
431 target trials for younger and middle-aged adults ( $t = 2.56$ ,  $p = 0.0157$ ;  $t = 2.824$ ,  $p =$   
432  $0.0135$ ). However, nbM-HPC coupling was significantly greater during distractor trials for  
433 older adults ( $t = -2.635$ ,  $p = 0.0151$ ) (*Figure 3*). Across age groups, nbM-left HPC coupling  
434 between targets and distractors in older adults significantly decreased compared to  
435 younger and middle-aged adults ( $t = 3.37$ ,  $p = 0.0014$ ;  $t = 4.086$ ,  $p = 0.0002$ ). There was  
436 no significant difference in nbM-HPC coupling between young and middle-aged adults ( $t$   
437  $= -0.872$ ,  $p = 0.387$ ). The change in nbM-HPC functional connectivity between targets  
438 and distractors had a significant negative correlation with years of age ( $r = -0.269$ ,  $p =$   
439  $0.024$ ). When testing for any quadratic effects there was a significant curvilinear  
440 relationship between nbM-HPC functional connectivity with age ( $p = 0.0458$ ), but this does  
441 not survive multiple comparisons correction. Similar to nbM-LC coupling, task-dependent  
442 nbM-HPC coupling was greater during target trials in younger and middle-aged adults,  
443 but markedly reversed to be greater during distractor trials in older age.

444       There was no significant nbM-MS task-dependent coupling for any main effects  
445 nor interactions. This aligns with the lack of previous literature indicating structural  
446 connections between the nbM and MS. There was also no significant nbM-PCC coupling  
447 for any main effects nor interactions. Overall, with the nbM as a seed region, gPPI

448 analysis revealed that nbM coupling with the LC and bilaterally with the HPC interacts  
449 with trial type and age. Further examination reveals similar age differences in nbM-LC  
450 and nbM-HPC coupling, with increased connectivity during target trials until old age in  
451 which there is increased connectivity during distractor trials. There are clear task-  
452 dependent changes in nbM coupling with the LC and HPC that markedly change with  
453 age, especially later in life.

454

#### 455 *MS-seeded network*

456 GPPI interaction parameter estimates for trials, by tone type and age group and their  
457 interaction (tone x age group), during the go/no go task were entered into a linear mixed  
458 effects model to assess MS task-dependent functional connectivity with known afferents.

459

460 *MS-HPC*. Significant clusters in the HPC represented MS-HPC functional connectivity  
461 changes across task conditions. There was a significant HPC cluster for the main effect  
462 of age group across all trial types (X,Y,Z = -31, 6, -28; cluster size = 21 voxels; F = 7.455;  
463 p = 0.035) and a cluster for the main effect of trial type (X,Y,Z = 20, 27, -19; cluster size  
464 = 75 voxels; F = 6.675, p = 0.0217). There was a significant HPC cluster in the left  
465 hemisphere for the age-by-trial type interaction (X,Y,Z = 22, 23, -9; cluster size = 63  
466 voxels; z = 2.905; p = 0.0062).

467 One-sample t-tests revealed that in young and middle-aged adults, MS-HPC  
468 coupling was greater during targets relative to distractor trials (t = 2.384, p = 0.023; t =  
469 3.370, p = 0.0045, respectively). In older adults, there was no difference between target  
470 and distractor MS-HPC connectivity (t = -0.943, p = 0.354). MS-HPC coupling differences

471 between targets and distractors in older adults was significantly decreased compared to  
472 younger and middle-aged adults ( $t = 2.296$ ,  $p = 0.025$ ;  $t = 3.678$ ,  $p = 0.0007$ , respectively).  
473 Additionally, middle-aged adults had greater MS-HPC coupling than younger adults ( $t = -$   
474  $2.145$ ,  $p = 0.037$ ) (*Figure 4*). The change in MS-HPC functional connectivity between  
475 targets and distractors did not have a significant linear correlation with age ( $r = -0.134$ ,  $p$   
476  $= 0.264$ ). The results overall suggest that task-dependent MS-HPC coupling is greater  
477 during target trials in younger adults, increases more in middle-aged adults, but in older  
478 adults is no longer different between target and distractor trials. Notably, MS-HPC  
479 coupling is significantly different across all age groups, suggesting that MS-HPC coupling  
480 dynamically changes across the entire lifespan, not just in old age.

481 In line with the known structural connectivity of the MS, there were no significant MS-  
482 LC (España & Berridge, 2006), MS-nbM, nor MS-PCC task-dependent coupling for the  
483 main effect of age and trial type, nor the interaction of age and trial type. Altogether, MS-  
484 HPC task-dependent coupling is greater during target trials in younger adults, increases  
485 even more so in middle-aged adults, but markedly decreases in older adults where MS-  
486 HPC coupling is no longer differentiated between target and distractor trials. Thus, MS-  
487 HPC coupling changes across the lifespan with significant age differences present  
488 already in middle age.

489

490 Summary of results:

491 In younger adults, we observed significant task-related functional coupling in all  
492 seed regions, with the majority of task-dependent connections stronger in target (salient)  
493 trials. This network structure reconfigures in middle age, with functional connectivity

494 increasing between many regions, with an overall increase in connections stronger in  
495 target trials (Figure 5). In middle-aged adults the strength of connectivity increases across  
496 several network edges, such as between the MS and HPC, whereas LC-PCC coupling is  
497 no longer significant. Further, in middle age LC-nbM coupling begins to encode a  
498 distracting signal. In old age, the network became much sparser, with only two node pairs  
499 with significant task-dependent connectivity, the nbM-HPC and LC-nbM. With old age  
500 nbM-HPC connectivity now encodes a distracting signal, whereas LC-nbM connectivity  
501 now encodes a salience signal, a complete reversal from middle age. Additionally, the  
502 ratio of target-related connections compared to distractor-related connections is most  
503 strongly reduced in older adults.

504

## 505 **Discussion**

506 In this study we examined how age alters functional coupling between known  
507 afferent projection sites of noradrenergic and cholinergic subcortical nuclei during  
508 attentional orienting. We demonstrated changes in task-dependent functional connectivity  
509 amongst neuromodulatory regions which relate to attentional orienting and task switching  
510 on the timescale of seconds (Berridge & Waterhouse, 2003; Aston-Jones & Cohen,  
511 2005). We found that functional connectivity between the nbM and HPC was greater  
512 during target trials than distractor trials in young and middle-aged adults, but in old age  
513 the reverse was true. In contrast, LC connectivity with the PCC and MS connectivity with  
514 the HPC was strongest during distractor trials and target trials, respectively, in younger  
515 individuals. LC connectivity to PCC and MS were no longer related to task condition by  
516 old age, indicating an age-related reduction in task-related connectivity across these

517 regions. Altogether, task-dependent connectivity across this network of regions changed  
518 in both middle and old age, with an overall sparser and refocused network dominated by  
519 functional coupling between neuromodulatory nuclei in older adults. As successful  
520 attentional orienting requires complimentary salience and distractor signals to orient  
521 attention within a rapidly changing environment, with age the network supporting the push  
522 and pull between these signals is sparser. In old age this network appears to contain  
523 fewer nodes, resulting in an altered contribution of attentional gain relative to attentional  
524 tuning.

525 We restricted our analysis to nodes with known structural connectivity and we found  
526 functional coupling between the LC, BF, HPC, and PCC (Levitt & Moore, 1978; Mesulam  
527 et al., 1983; Espana & Berridge, 2006; Walling et al, 2011; Hagena, Hansen & Manahan-  
528 Vaughan, 2016; Hansen et al., 2017; Wagatsuma et al., 2017; Bacon, Pickering, & Mellor,  
529 2020; James et al. 2020). As expected, these results indicate that attentional orienting  
530 coactivates regions with synaptic connections (Kellerman et al., 2012). The observed  
531 coupling also replicates previous findings of the resting-state functional connectivity  
532 between the LC and PCC (Jacobs et al., 2018; Turker et al., 2021), LC and HPC (Turker  
533 et al., 2021), LC and nbM (Jacobs et al., 2018), and nbM and PCC (Markello et al., 2018).  
534 Our finding that LC-HPC functional connectivity is numerically greater for target compared  
535 to distractor trials is in the same direction as a prior result using the same task (Moyal et  
536 al., 2022). Unlike previous studies which assessed age-related functional connectivity  
537 amongst this network during rest, we demonstrate functional coupling within this network  
538 that supports specific aspects of trial-by-trial changes in attentional state and is modulated  
539 by noradrenergic and cholinergic coactivation with several regions. In doing so, we show



540 a pronounced age-related network reconfiguration which follows the known anatomical  
541 connections across these neuromodulatory regions.

542 Despite the age-related alterations in this network, the older adults in this study were  
543 all healthy with no diagnosed cognitive deficits. Although much evidence indicates  
544 cognitive decline with aging, not all aspects of cognition diminish with age and some  
545 domains may even improve with aging. Meta-analyses of psychophysiological and  
546 cognitive assessments performed in older adults indicate mixed results across decades  
547 of studies (Madden, 2007; Verissimo et al., 2022). Reaction time, distraction detection,  
548 and other attentional orienting performance metrics appear to diminish with old age, but  
549 other aspects of attention such as attentional control and decreased mind-wandering  
550 have been shown to be preserved through at least some stages of old age (Fountain-  
551 Zaragoza et al., 2018; Verissimo et al., 2022). These inconsistencies may be a result of  
552 large variability in the older population. Amongst potential mediators of this heterogeneity  
553 are educational experience and socioeconomic status (Verissimo et al. 2022). Though  
554 we cannot directly relate individual variability of our older sample to the age-related  
555 connectivity changes in these neuromodulatory networks, our results suggest that regions  
556 responsible for attentional orienting dynamically change across the lifespan. Further work  
557 is needed to characterize the relationship between heterogeneous cognitive outcomes in  
558 old age with functional and structural changes of these regions.

559 Although aspects of attention may be preserved with old age, much evidence indicates  
560 robust age-related deficits (Coubard et al., 2011; Cashdollar et al., 2013; Bier et al., 2017).  
561 We demonstrate a drastically sparser network structure in older adults which may account  
562 for some of these age-related deficits. For example, the sparser connectivity and weaker

563 functional coupling supporting distractor signaling aligns with the finding that older adults  
564 have prolonged processing of distractors and weakened distractor detection (Cashdollar  
565 et al., 2013). Our results indicate that older adults have strong LC-nbM coupling  
566 supporting salience signals but a weak nbM-HPC coupling supporting distractor signals  
567 compared to distraction-supporting connectivity earlier in life, suggesting that this  
568 reconfigured attentional network may be the origin of stronger attentional gain without  
569 tuning (Riley et al., 2023). Although the network does become sparser with age,  
570 consistent with a monotonic decline, the functional connections between the LC and nbM  
571 becomes strengthened. As the NE and ACh systems have been proposed to  
572 synergistically support attentional switching and uncertainty in the environment, it holds  
573 that healthy older adults with sparse cortical connectivity with the LC and BF still have  
574 significant LC-BF functional coupling (Yu & Dayan, 2005; Munn, Müller, Wainstein, &  
575 Shine, 2021). In young and middle age, the LC and BF influence the attentional system  
576 through subcortical-cortical task-dependent functional connections. This diverse network  
577 architecture allows for the LC and BF to influence its afferents, namely the HPC and PCC,  
578 in a task-dependent manner, which has been previously shown to support faithful  
579 attentional and memory processing (Levitt & Moore, 1978; Mesulam et al., 1983; Detari,  
580 Sembra, & Rasmusson, 1997; Espana & Berridge, 2006; Markello et al., 2018). In the  
581 healthy older adults, we observed that neuromodulatory coupling with cortical afferents  
582 was largely reduced, with the LC and MS no longer having significant attention-dependent  
583 coupling with the HPC nor with the PCC, respectively. Since no attentional deficits were  
584 detected in this healthy older adult sample and LC-nbM functional coupling was one of  
585 the two significant network edges remaining in this age group, it is evident that these

586 neuromodulatory nuclei more sparsely connect with their cortical afferents with age but  
587 maintain strong internuclei connectivity.

588 Despite being a potentially compensatory effect, this altered network architecture  
589 likely creates a vulnerable system in which cognitive abilities, such as attentional  
590 reorienting and task switching, may be at risk for becoming deficient (Peters, A., Setharas,  
591 C., & Luebke, J. I., 2008; Arnsten, Wang, & Paspalas, 2012). As mentioned previously,  
592 the LC and BF are some of the first regions to show evidence of structural and functional  
593 alterations with Alzheimer's Disease (Zarow et al., 2003; Weinshenker, 2008; Teipel et  
594 al., 2014; Kerbler et al., 2015; Liu et al., 2015; Jacobs et al., 2019; Dutt et al., 2020;  
595 Beardmore et al., 2021; Dahl et al., 2021). Our study builds on a body of literature that  
596 overall demonstrates significant changes in these neuromodulatory systems in both  
597 healthy and pathological aging. Although our healthy older adult sample did not include  
598 any individuals with a diagnosis of cognitive impairment or serious neurological disease,  
599 there were likely many cases of prodromal neurodegenerative disease since roughly 50%  
600 of individuals who live into their 90s will be diagnosed with Alzheimer's Disease (Gilsanz  
601 et al., 2019). Once symptoms of Alzheimer's Disease reach a clinical level, damage to  
602 these neuromodulatory regions is already substantial (Braak, 2011) and treatment has  
603 limited effects on symptoms and time course of the disease. Given that the LC and BF  
604 are critical for cognitive impairment with age, investigating the functional coupling of the  
605 network we measured in older adults with diagnosed Mild Cognitive Impairment (MCI)  
606 and Alzheimer's Disease (AD) will inform how disease onset and progression relates to  
607 restructuring of the LC and BF network along the same timescale. Investigating this

608 functional network in older adults with cognitive impairments is a vital target for future  
609 work.

610 Our results additionally inform hypotheses about the synergistic role that the LC and  
611 nbM perform together to alter large-scale brain states. The balancing act that our brain  
612 upholds throughout our everyday life requires rapidly allocating attentional resources to  
613 the many inputs our system receives, including both external sensory and internally  
614 generated inputs. As it has been posited that neuromodulatory systems are at this  
615 interface of generating flexible brain states, it follows that these two systems require  
616 functional coupling to allow for rapid fluctuations in attention and downstream cognition  
617 (Shine, 2019; Munn et al., 2021). There is evidence to suggest that the balance between  
618 integration and segregation is related to white matter connectivity and that large-scale  
619 network shifts from phasic LC and nbM firing covary with the strength of the structural  
620 connectivity between the LC and nbM (Taylor et al., 2022). In line with this evidence, our  
621 results indicate strong LC-nbM functional connectivity during second-to-second changes  
622 in attentional orienting.

623 Several limitations to the current work can be further addressed in future work. First,  
624 our dataset is undersampled within the 46-65 years old middle age group and has high  
625 variance. As many structural and functional deficits can already be seen in middle age,  
626 investigating this age group is of great importance for interventional and preventative  
627 measures against age-related cognitive impairment (Jacobs et al., 2018). Future work will  
628 assess how attention-dependent functional connectivity between the LC and nbM  
629 changes with cognitive deficits, such as in MCI and AD, and how this coupling relates to  
630 disordered attentional control. As several studies have shown that functional connectivity

631 measured with fMRI is strongly correlated with the underlying structural connectome  
632 (Honey et al., 2009; O'Reilly et al., 2013), we would expect that major structural changes  
633 in MCI and AD would subsequently interfere with this network's task-dependent functional  
634 coupling and drastically perturb the network architecture we observed.

635 In conclusion, we find that the major sources of norepinephrine and acetylcholine  
636 of the brain, the LC and BF nuclei, and their known structural connections coordinate to  
637 support trial-by-trial attentional orienting and do so differently across the lifespan. In old  
638 age, these neuromodulatory networks supporting attentional regulation of afferent cortical  
639 regions become sparser; however, the mutual connectivity between neuromodulatory  
640 nuclei strengthens. Our findings provide new insights into how neuromodulatory nuclei  
641 support attention-state dependent functional coupling, and how their changes support  
642 attentional orienting with healthy aging.

643

#### 644 **Code Accessibility**

645 Customized software created for the gPPI analyses can be made available upon request.

646

## References

- 647 Arnsten, A. F. T., Wang, M. J., & Paspalas, C. D. (2012). Neuromodulation of thought:  
648 Flexibilities and vulnerabilities in prefrontal cortical network synapses. *Neuron*, *76*,  
649 233-239. doi: <https://doi.org/10.1016/j.neuron.2012.08.038>
- 650 Aston-Jones, G., & Cohen, J. D. (2005). An integrative theory of locus coeruleus-  
651 norepinephrine function: Adaptive gain and optimal performance. *Annual Review*  
652 *of Neuroscience*, *28*(1), 403–450.  
653 <https://doi.org/10.1146/annurev.neuro.28.061604.135709>
- 654 Bacon, T., Pickering, A., & Mellor J. (2020). Noradrenaline release from locus coeruleus  
655 terminals in the hippocampus enhances excitation-spike coupling in CA1  
656 pyramidal neurons via  $\alpha$ -adrenoreceptors. *Cerebral Cortex*, *30*, 6135-6151.  
657 doi:10/1093/cercor/bhaa159
- 658 Beardmore, R., Hou, R., Darekar, A., Holmes, C., & Boche, D. (2021). The locus  
659 coeruleus in aging and Alzheimer’s Disease: A postmortem and brain imaging  
660 review. *J Alzheimers Dis.*, *83*, 5-22. doi: 10.3233/JAD-210191
- 661 Berridge, C. W. & Waterhouse, B. D. (2003). The locus coeruleus-noradrenergic  
662 system: modulation of behavioral state and state-dependent cognitive processes.  
663 *Brain Research Reviews*, *42*, 33-84. doi: 10.1016/S0165-0173(03)00143-7
- 664 Berti, S., Grunwald, M., & Schroger, E. (2013). Age dependent changes of distractibility  
665 and reorienting of attention revisited: an event-related potential study. *Brain Res.*,  
666 *1491*, 156-166. doi: 10/1016/j.brainres.2012.11.009
- 667 Bier, B., Lecavalier, N. C., Malenfant, D., Peretz, I., & Bellevile, S. (2017). Effect of

- 668           aging on attentional control in dual-tasking. *Exp Aging Res.*, 43, 161-177.  
669           doi:10.1080/0361073X.2017.1276377
- 670   Cashdollar, N., Fukuda, K., Bocklage, A., Aурtenetxe, S., Vogel, E. K., & Gazzaley, A.  
671           (2013). Prolonged disengagement from attentional capture in normal aging.  
672           *Psychol. Aging*, 28, 77-86. doi:10.1037/a0029899.
- 673   Chun, M. M. & Turk-Browne, N. B. (2007). Interactions between attention and memory.  
674           *Current Opinion in Neurobiology*, 17, 177-184. doi:  
675           <https://doi.org/10.1016/j.conb.2007.03.005>
- 676   Corbetta, M., Patel, G., & Shulman, G. L. (2008). The reorienting system of the human  
677           brain: From environment to theory of mind. *Neuron*, 58, P306-324. doi:  
678           <https://doi.org/10.1016/j.neuron.2008.04.017>
- 679   Coubard, O. A., Ferrufino, L., Boura, M., Gripon, A., Renaud, M., & Bherer, L. (2011).  
680           Attentional control in normal aging and Alzheimer's disease. *Neuropsychology*,  
681           25, 353-356. doi:10.1037/a0022058.
- 682   Dahl, M. J., Mather, M., Düzel, S., Bodammer, N. C., Lindenberger, U., Kühn, S.,  
683           Werkle-Bergner, M. (2019). Rostral locus coeruleus integrity is associated with  
684           better memory performance in older adults. *Nat Hum Behav*, 3, 1203–1214.  
685           PMID: 31501542
- 686   Detari, L., Semba, K., & Rasmusson, D. D. (1997). Responses of cortical EEG-related  
687           basal forebrain neurons to brainstem and sensory stimulation in urethane-  
688           anesthetized rats. *European Journal of Neuroscience*, 9, 1153-1161.
- 689   Dutt, S., Li, Y., Mather, M., & Nation, D. A. (2020). Brainstem volumetric integrity in

690           preclinical and prodromal Alzheimer's disease. *J Alzheimers Dis.*, 77, 1579-1594.  
691           doi: 10.3233/JAD-200187

692   Espana, R., & Berridge, C. W. (2006). Organization of noradrenergic efferents to  
693           arousal-related basal forebrain structures. *The Journal of Comparative*  
694           *Neurology*, 496, 668-683. doi: 10.1002/cne.20946

695   Fountain-Zaragoza, S., Puccetti, N. A., Whitmoyer, P., & Prakash, R. S. (2018). Aging  
696           and attentional control: Examining the roles of mind-wandering propensity and  
697           dispositional mindfulness. *J Int Neuropsychol Soc*, 24, 876-888.  
698           doi:10.1017/S1355617718000553.

699   Gilzanz, P., Corrada, M. M., Kawas, C. H., Mayeda, E. R., Glymour, M. M.,  
700           Quesenberry Jr., C. P., Lee, C., & Whitmer, R. A. (2019). Incidence of dementia  
701           after age 90 in a multiracial cohort. *Alzheimer's Dement.*, 15, 497-505. doi:  
702           10.1016/j.jalz.2018.12.006

703   Hagena, H., Hansen, N., Managan-Vaughan, D. (2016). â-adrenergic control of  
704           hippocampal function: Subservicing the choreography of synaptic information  
705           storage and memory. *Cerebral Cortex*, 26, 1349-1364. doi:10.1093/cercor/bhv30

706   Hansen, N. (2017). The longevity of hippocampus-dependent memory is orchestrated  
707           by the locus coeruleus-noradrenergic system. *Neural Plasticity*.  
708           doi:10.1155/2017/2727602

709   Honey, C. J., Sporns, O., Cammoun, L., Gigandet, X., Thiran, J. P., Meuli, R., &  
710           Hagmann, P. (2009). Predicting human resting-state functional connectivity from  
711           structural connectivity. *PNAS*, 106, 2035-2040.  
712           <https://doi.org/10.1073/pnas.0811168106>



- 713 Huang, G. B., Jain, V., & Learned-Miller, E. (2007). Unsupervised joint alignment of  
714 complex images. *2007 IEEE 11th International Conference on Computer Vision*,  
715 1-8. <https://doi.org/10.1109/ICCV.2007.4408858>
- 716 Jacobs, H. I. L., Muller-Ehrenberg, L., Priovoulos, N., & Roebroek, A. (2018).  
717 Curvilinear locus coeruleus functional connectivity trajectories over the adult  
718 lifespan: a 7T MRI study. *Neurobiology of Aging*, *69*, 167-176.  
719 <https://doi.org/10.1016/j.neurobiolaging.2018.05.021>
- 720 Jacobs, H. I. L., Becker, A., Sperling, R. A., Guzman-Velez, E., Baena, A., Uquillas, F.  
721 d'Oleire, ... Quiroz, Y. T. (2019). Locus coeruleus intensity is associated with  
722 early amyloid and tau pathology in preclinical autosomal dominant Alzheimer's  
723 disease. *Alzheimer's & Dementia*, *15*, P774–P775.  
724 <https://doi.org/10.1016/j.jalz.2019.06.2832>
- 725 James, T., Kula, B., Choi, S., Khan, S., Bekar, L., & Smith, N. (2021). Locus coeruleus  
726 in memory formation and Alzheimer's disease. *European Journal of*  
727 *Neuroscience*, *54*, 6948-6959. doi:10.1111/ejn.15045
- 728 Kellerman, T., Regenbogen, C., De Vos, M., Mößnang, C., Finkelmeyer, A. & Habel, U.  
729 (2015). Effective connectivity of the human cerebellum during visual attention. *J*  
730 *Neuro*, *33*, 11453-11460. DOI: [https://doi.org/10.1523/JNEUROSCI.0678-](https://doi.org/10.1523/JNEUROSCI.0678-12.2012)  
731 [12.2012](https://doi.org/10.1523/JNEUROSCI.0678-12.2012)
- 732 Kerbler, G., M., Fripp, J., Rowe, C. C., Villemagne, V. L., Salvado, O., Rose, S., &  
733 Coulson, E. J. (2015). Basal forebrain atrophy correlates with amyloid  $\beta$  burden  
734 in Alzheimer's disease. *NeuroImage: Clinical*, *7*, 105-113.  
735 <http://dx.doi.org/10.1016/j.nicl.2014.11.015>

- 736 Keren, N. I., Lozar, C. T., Harris, K. C., Morgan, P. S., & Eckert, M. A. (2009). In-vivo  
737 mapping of the human locus coeruleus. *NeuroImage*, *47*, 1261-1267. doi:  
738 10.1016/j.neuroimage.2009.06.012
- 739 Levitt, P. & Moore, R. Y. (1978). Noradrenaline neuron innervation of the cortex in the  
740 rat. *Brain Research*, *139*, 219-231. [https://doi.org/10.1016/0006-8993\(78\)90925-](https://doi.org/10.1016/0006-8993(78)90925-3)  
741 3
- 742 Liu, X., Ye, K., Weinschenker, D. (2015). Norepinephrine protects against amyloid- $\beta$   
743 toxicity via TrkB. *J Alzheimers Dis*, *44*, 251–260. doi: 10.3233/JAD-141062
- 744 Madden, D. J. (2007). Aging and visual attention. *Association for Psychological*  
745 *Science*, *16*, 70-74. doi: 10.1111/j.1467-8721.2007.00478.x
- 746 Madden, D. J., & Langley, L. K. (2003). Age-related changes in selective attention and  
747 perceptual load during visual search. *Psychol Aging.*, *18*, 54-67. doi:  
748 10.1037/0882-7974.18.1.54
- 749 Markello, R. D., Spreng, N. R., Luh, W., Anderson, A. K., & De Rosa, E. (2018).  
750 Segregation of the human basal forebrain using resting state functional MRI.  
751 *NeuroImage*, *173*, 287-297. <https://doi.org/10.1016/j.neuroimage.2018.02.042>
- 752 Mather, M., & Harley, C. W. (2016). The locus coeruleus: Essential for maintain  
753 cognitive function and the aging brain. *Trends in Cognitive Science*, *20*(4), 214-  
754 227. <http://dx.doi.org/10.1016/j.tics.2016.01.001>
- 755 Mesulam, M. M., Mufson, E. J., Levey, A. I., & Wainer, B. H. (1983). Cholinergic  
756 innervation of cortex by the basal forebrain: cytochemistry and cortical  
757 connections of the septal area, diagonal band, nucleus basalis (substantia

- 758           innominata), and hypothalamus in the rhesus monkey. *J Comp Neurol*, 214, 170-  
759           197. doi: 10.1002/cne.902140206
- 760 Moyal, R., Turker, H. B., Luh, W., & Swallow, K. M. (2022). Auditory target detection  
761           enhances visual processing and hippocampal functional connectivity. *Front.*  
762           *Psychol.*, 13, <https://doi.org/10.3389/fpsyg.2022.891682>
- 763 Munn, B. R., Müller, E. J., Wainstein, G., & Shine, J. M. (2021). The ascending arousal  
764           system shapes neural dynamics to mediate awareness of cognitive states.  
765           *Nature Communications*, 12, 6016. <https://doi.org/10.1038/s41467-021-26268-x>
- 766 O'Reilly, J. X., Croxson, P. L., Jbabdi, S., Sallet, J., Noonan, M. P., Mars, R. B.,  
767           Browning, P. G. F., Wilson, C. R. E., Mitchell, A. S., Miller, K. L., Rushworth, M.  
768           F. S., & Baxter, M. G. (2013). Causal effect of disconnection of lesions on  
769           interhemispheric functional connectivity in rhesus monkeys. *PNAS*, 110, 13982-  
770           13987. <https://doi.org/10.1073/pnas.1305062110>
- 771 Peters, A., Setharas, C., & Luebke, J. I. (2008). Synapses are lost during aging in the  
772           primate prefrontal cortex. *Neuroscience*, 152, 970-981. doi:  
773           10.1016/j.neuroscience.2007.07.014.
- 774 Riley, E., Turker, H., Wang, D., Swallow, K. M., Anderson, A. K., & De Rosa, E. (2023).  
775           Nonlinear changes in pupillary attentional orienting responses across the  
776           lifespan. *GeroScience*. <https://doi.org/10.1007/s11357-023-00834-1>
- 777 Sarter, M., Givens, B., & Bruno. J. P. (2001). The cognitive neuroscience of sustained  
778           attention: where top-down meets bottom-up. *Brain Research Reviews*, 35, 146-  
779           160. [https://doi.org/10.1016/S0165-0173\(01\)00044-3](https://doi.org/10.1016/S0165-0173(01)00044-3)
- 780 Shine, J. (2019). Neuromodulatory influences on integration and segregation in the

781 brain. *Trends in Cognitive Science*, 23, 572-583. doi:  
782 <https://doi.org/10.1016/j.tics.2019.04.002>

783 Swallow, K. M., & Jiang, Y. V. (2010). The attentional boost effect: Transient increases  
784 in attention to one task enhance performance in a second task. *Cognition*, 115,  
785 118-132. doi: 10.1016/j.cognition.2009.12.003

786 Swallow, K. M., & Jiang, Y. V. (2014). The attentional boost effect really is a boost:  
787 Evidence from a new baseline. *Atten Percept Psychophys*, 76, 1298-1307. doi:  
788 10.3758/s13414-014-0677-4

789 Swallow, K. M., Broitman, A. W., Riley, E., Turker, H. B. (2022). Grounding the  
790 attentional boost effect in events and the efficient brain. *Front Psychol.*, 13,  
791 892416. doi: 10.3389/fpsyg.2022.892416

792 Taylor, N. L., D'Souza, A., Munn, B. R., Lv, J., Zaborsky, L., Muller, E. J., Wainstein, G.,  
793 Calamante, F., & Shine, J. M. (2022). Structural connections between the  
794 noradrenergic and cholinergic system shape the dynamics of functional brain  
795 networks. *NeuroImage*, 260, 119455.  
796 <https://doi.org/10.1016/j.neuroimage.2022.119455>

797 Teipel, S., Heinsen, H., Amaro Jr., E., Grinberg, L. T., & Krause, B., Grothe, M. (2014).  
798 Cholinergic basal forebrain atrophy predicts amyloid burden in Alzheimer's  
799 disease. *Neurobiology of Aging*, 35, 482-491.  
800 <http://dx.doi.org/10.1016/j.neurobiolaging.2013.09.029>

801 Turker, H. B., Riley, E., Luh, W., Colcombe, S. J., & Swallow, K. M. (2021). Estimates of

802 locus coeruleus function with functional magnetic resonance imaging are  
803 influenced by localization approaches and the use of multi-echo data.  
804 *NeuroImage*, 118047, doi: 10.1016/j.neuroimage.2021.118047.

805 Verissimo, J., Verhaeghen, P., Goldman, N., Weinstein, M., & Ullman, M. T. (2022).  
806 Evidence that ageing yields improvements as well as declines across attention  
807 and executive functions. *Nature Human Behavior*, 6, 97-110.  
808 <https://doi.org/10.1038/s41562-021-01169-7>

809 Wagatsuma, A., Okuyama, T., Sun, C. Smith, L., Abe, K., & Tonegawa, S. (2017).  
810 Locus coeruleus input to the hippocampal CA3 drives single-trial learning of a  
811 novel context. *Proceedings of the National Academy of Sciences of the United*  
812 *States of America*, 115, E310-E316. doi:10/1073/pnas.1714082115

813 Walling, S., Brown, R., Milway, J., Earle, A., & Harley, C. (2011). Selective tuning of  
814 hippocampal oscillations by phasic locus coeruleus activation in awake male rats.  
815 *Hippocampus*, 21, 1250-1262. doi:0.1002/hipo.20816.

816 Weinshenker, D. (2008). Functional Consequences of Locus Coeruleus Degeneration in  
817 Alzheimers Disease. *Current Alzheimer Research*, 5(3), 342–345.  
818 <https://doi.org/10.2174/156720508784533286>

819 Willenbockel, V., Sadr, J., Fiset, D., Horne, G. O., GOsselin, F., & Tanaka, J. W. (2010).  
820 Controlling low-level image properties: The SHINE toolbox. *Behavior Research*  
821 *Methods*, 42, 671-684. <https://doi.org/10.3758/BRM.42.3.671>

822 Yu, A. J., & Dayan, P. (2005). Uncertainty, neuromodulation, and attention. *Neuron*, 46,  
823 681-692. Doi: 10.1016/j.neuron.2005.04.026

824 Zarow, C., Lyness, S. A., Mortimer, J. A., & Chui, H. C. (2003). Neuronal loss is greater

825 in the locus coeruleus than nucleus basalis and substantia nigra in Alzheimer  
826 and Parkinson Diseases. *Arch Neurol*, 60, 337-341. doi:  
827 10.1001/archneur.60.3.337  
828 Zaborszky, L., Hoemke, L., Mohlberg, H., Schleicher, A., Amunts, K., & Zilles, K. (2008).  
829 Stereotaxic probabilistic maps of the magnocellular cell groups in human basal  
830 forebrain. *NeuroImage*, 42, 1127-1141.  
831 <https://doi.org/10.1016/j.neuroimage.2008.05.055>

832 **Figure Legends**

833

834 **Figure 1. All ROIs in standard MNI space.** HPC and PCC ROIs are segmented from  
835 FreeSurfer's parcellation. nbM and MS ROIs are from a probabilistic atlas. LC ROIs are  
836 derived from neuromelanin-sensitive TSE scans. The HPC, PCC, nbM, MS, and LC ROIs  
837 above are from an example subject in standard MNI space. LC=locus coeruleus;  
838 HPC=hippocampus; nbM = Nucleus Basalis of Meynert; PCC=posterior cingulate cortex;  
839 MS=medial septum

840

841 **Figure 2. LC-seeded task-dependent functional connectivity across the lifespan.**  
842 Generalized psychophysiological interaction (gPPI) parameter estimates were extracted  
843 from the voxels within significant ROIs (*refer to Methods Section: Task-Dependent*  
844 *Functional Connectivity*). Regions of interest with a significant age-by-trial type interaction  
845 for task-dependent functional connectivity with the LC are shown. Note this is not an  
846 exhaustive figure including all ROIs with significant age-by-trial type interactions (top row)  
847 Significant clusters from the age-by-trial type interaction. Clusters are displayed and  
848 coordinates are listed in MNI N27 space. (middle row) For each cluster, the difference  
849 between target and distractor trial psychophysiological interaction parameter estimates  
850 are plotted. Each column displays the results for a given region. An asterisk to the right  
851 of a single colored bar indicates a significant difference from zero (no task-dependent  
852 connectivity changes) with a one-sample t-test. Asterisks spanning two colored bars  
853 indicate a significant difference across two age groups computed with a two-sample t-  
854 test. All statistical tests were corrected for multiple comparisons using Bonferroni

855 correction. (bottom row) Correlation between gPPI parameter estimates and age are also  
856 shown with the corresponding Pearson coefficient and p-value. LC-nbM functional  
857 connectivity had a significant age-by-trial type interaction such that the difference in  
858 connectivity between target and distractors was decreased in older adults compared to  
859 young and middle-aged adults. LC-HPC functional connectivity between target and  
860 distractor trials was greater in older adults compared to younger adults. LC-PCC  
861 functional connectivity was decreased in older adults compared to young and middle-  
862 aged adults. There was no significant LC-MS functional connectivity. LC=locus coeruleus;  
863 HPC=hippocampus; nbM = Nucleus Basalis of Meynert; PCC=posterior cingulate cortex;  
864 MS=medial septum

865 *nbM-seeded network*

866

867 **Figure 3. nbM-seeded task-dependent functional connectivity across the lifespan.**

868 Generalized psychophysiological interaction (gPPI) parameter estimates were extracted  
869 from the voxels within significant ROIs (*refer to Methods Section: Task-Dependent*  
870 *Functional Connectivity*). Regions with a significant age-by-trial type interaction for task-  
871 dependent functional connectivity with the nbM are shown. (top row) Significant clusters  
872 from the age-by-trial type interaction. Clusters are displayed and coordinates are listed  
873 in MNI space. (middle row) For each cluster, the difference between target and  
874 distractor trial gPPI estimates are plotted. Each column displays the results for a given  
875 region. An asterisk to the right of a single colored bar indicates a significant difference  
876 from zero with a one-sample t-test. Asterisks spanning two colored bars indicate a  
877 significant difference across two age groups computed with a two-sample t-test. All



878 statistical tests were corrected for multiple comparisons using Bonferroni correction.  
879 (bottom row) The correlation of the parameter estimates and age are also shown with  
880 the corresponding Pearson coefficient and p-value. nbM-LC and nbM-HPC functional  
881 connectivity had a significant age-by-trial type interaction such that the difference in  
882 connectivity between target and distractors was decreased in older adults compared to  
883 young and middle-aged adults. There was no significant LC-MS functional connectivity  
884 nor nbM-PCC functional connectivity. LC=locus coeruleus; HPC=hippocampus; nbM =  
885 Nucleus Basalis of Meynert; PCC=posterior cingulate cortex; MS=medial septum

886

887 **Figure 4. MS-seeded task-dependent functional connectivity across the lifespan.**

888 Generalized psychophysiological interaction (gPPI) parameter estimates were extracted  
889 from the voxels within significant ROIs (*refer to Methods Section: Task-Dependent*  
890 *Functional Connectivity*). Regions with a significant age-by-trial type interaction for task-  
891 dependent functional connectivity with the MS are shown. (top row) Significant clusters  
892 from the age-by-trial type interaction. Clusters are displayed and coordinates are listed in  
893 MNI N27 space. (middle row) For each cluster, the difference between target and  
894 distractor trial psychophysiological interaction parameter estimates are plotted. Each  
895 column displays the results for a given region. An asterisk to the right of a single colored  
896 bar indicates a significant difference from zero with a one-sample t-test. Asterisks  
897 spanning two colored bars indicate a significant difference across two age groups  
898 computed with a two-sample t-test. All statistical tests were corrected for multiple  
899 comparisons using Bonferroni correction. (bottom row) The correlation of the parameter  
900 estimates and age are also shown with the corresponding Pearson coefficient and p-

901 value. MS-HPC functional connectivity had a significant age-by-trial type interaction such  
902 that the difference in connectivity between target and distractors increased from young to  
903 middle age, but decreased in old age. There was no significant MS-LC, MS-nbM, nor MS-  
904 PCC functional connectivity. LC=locus coeruleus; HPC=hippocampus; nbM = Nucleus  
905 Basalis of Meynert; PCC=posterior cingulate cortex; MS=medial septum

906

907 **Figure 5. Path diagram summarizing the results from Figures 2-4.** Green lines  
908 indicate a significant relationship between functional coupling and task, with greater  
909 coupling during targets compared to distractors. For colored lines, line thickness and the  
910 values along the lines indicate the strength of the relationship, as measured by the t-  
911 statistic of the task-dependent coupling in each group calculated from a one-sample t-test  
912 against a mean of zero. Green lines indicate greater coupling during targets compared to  
913 distractors. Red lines indicate greater coupling during distractors compared to targets.  
914 Grey dotted lines indicate a relationship between functional coupling and task that had a  
915 p-value > 0.1. Color dotted lines indicate a relationship between functional coupling and  
916 task that had a p-value > 0.05 and p-value < 0.1. LC: locus coeruleus; nbM: nucleus  
917 basalis of Meynert; MS: medial septum; HPC: hippocampus; PCC: posterior cingulate  
918 cortex.

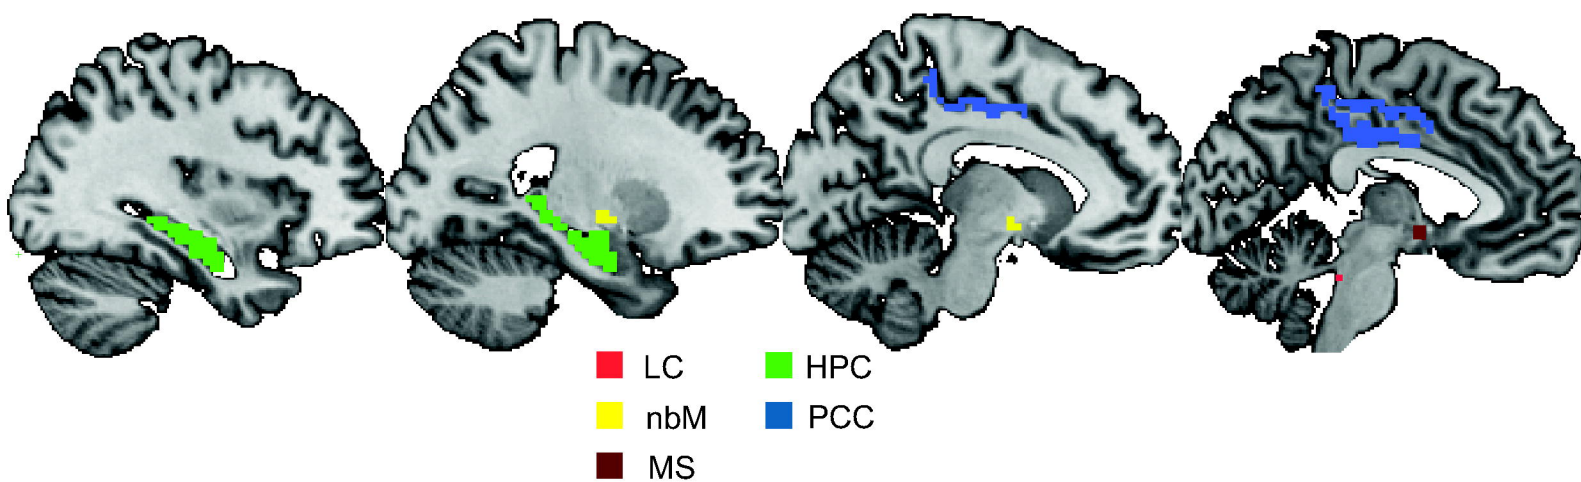

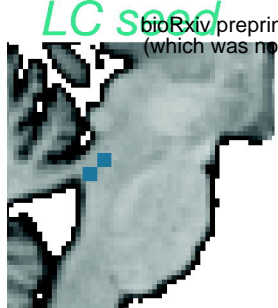

LC-HPC

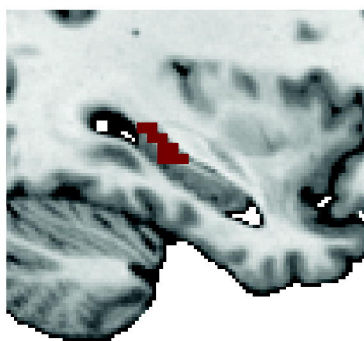

x = 34, y = 29, z = -9

LC-nbM

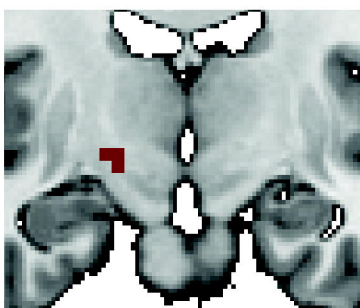

x = -19, y = 8, z = -6

LC-PCC

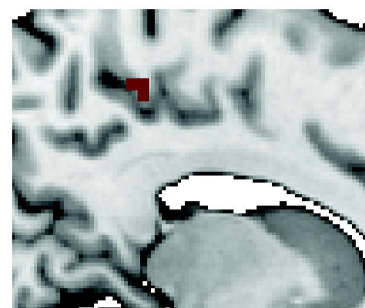

x = -10, y = 57, z = 11

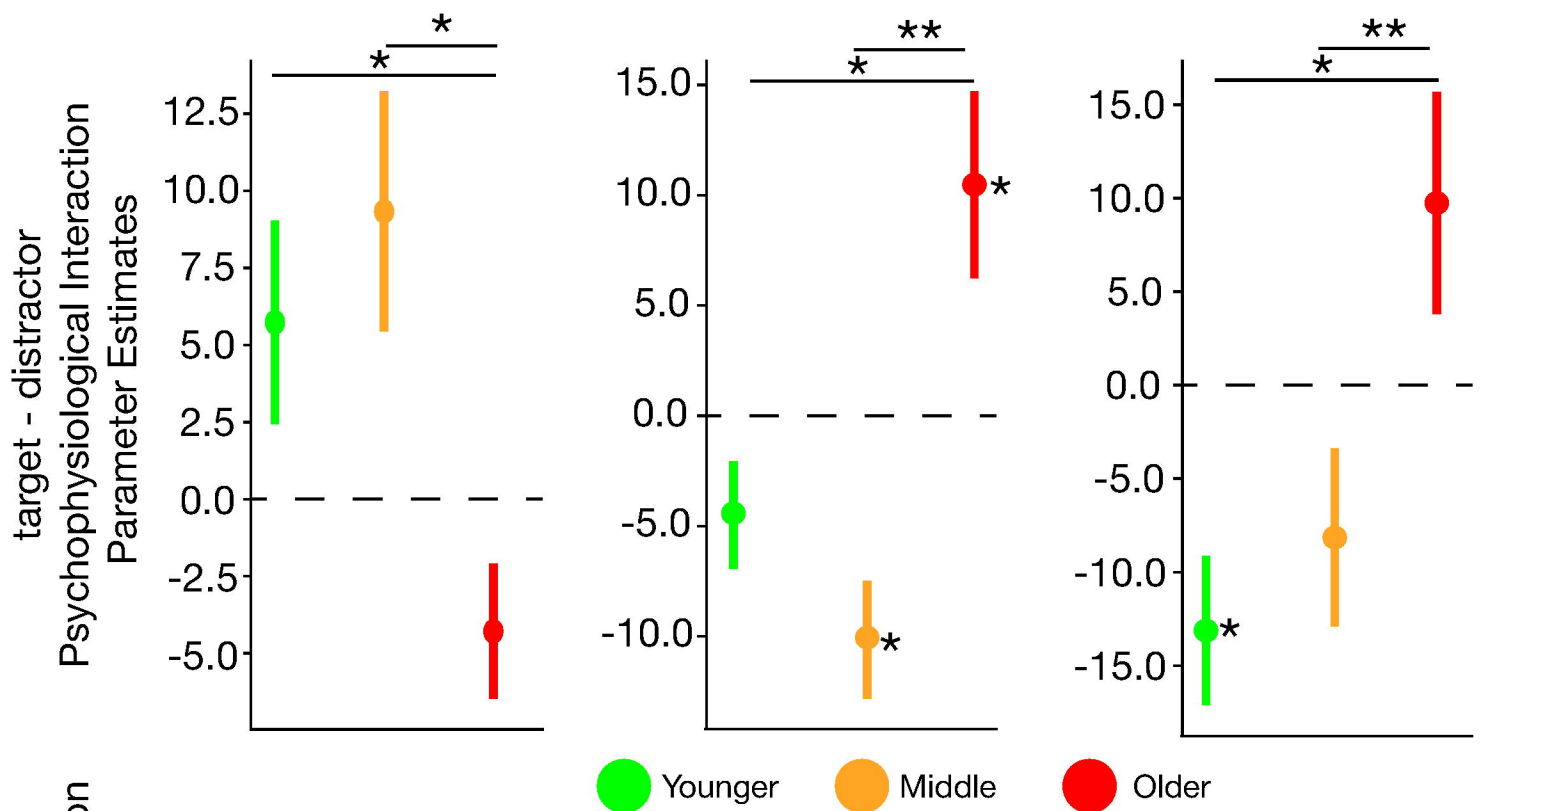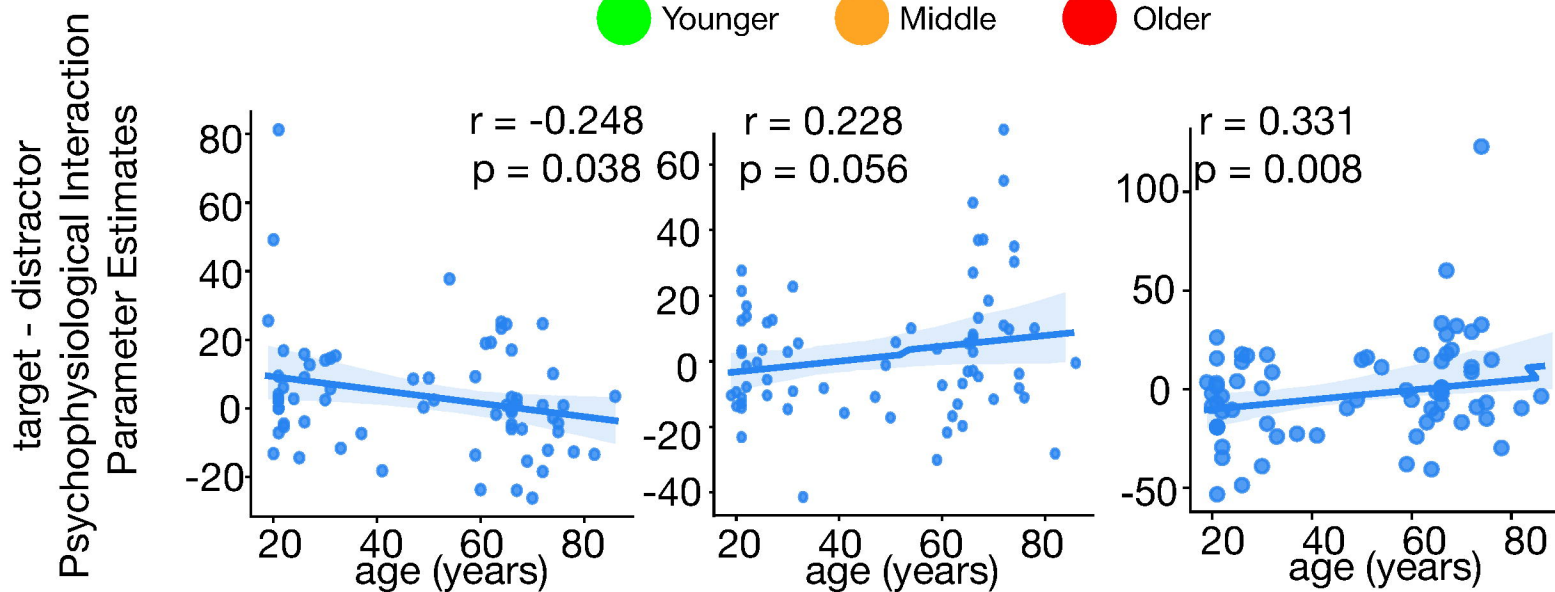

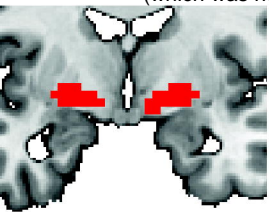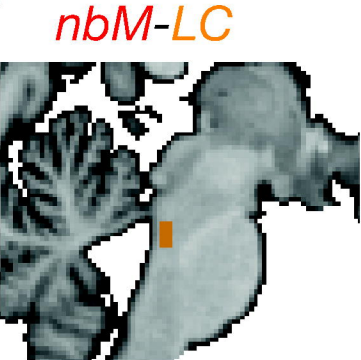

nbM-LC

x = -4, y = 33, z = -27

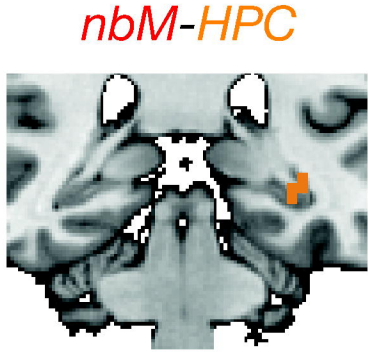

nbM-HPC

x = 31, y = 23, z = -9

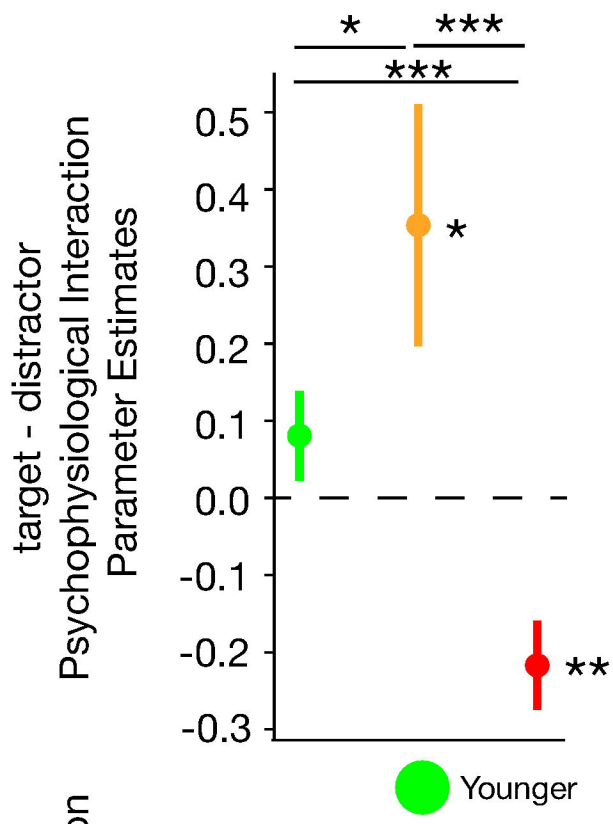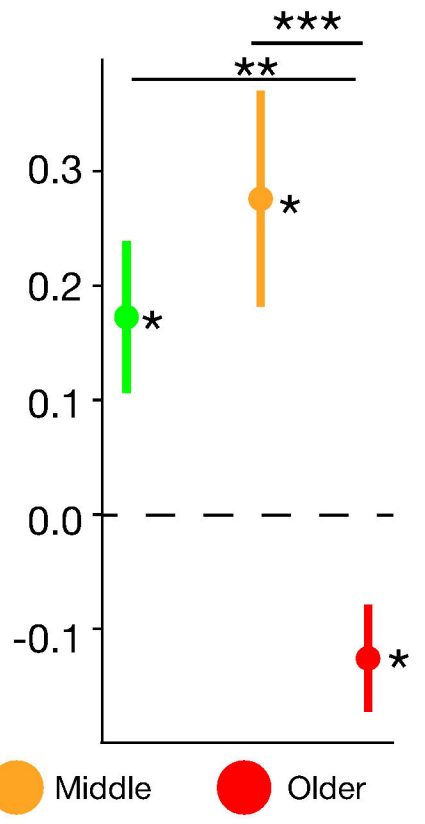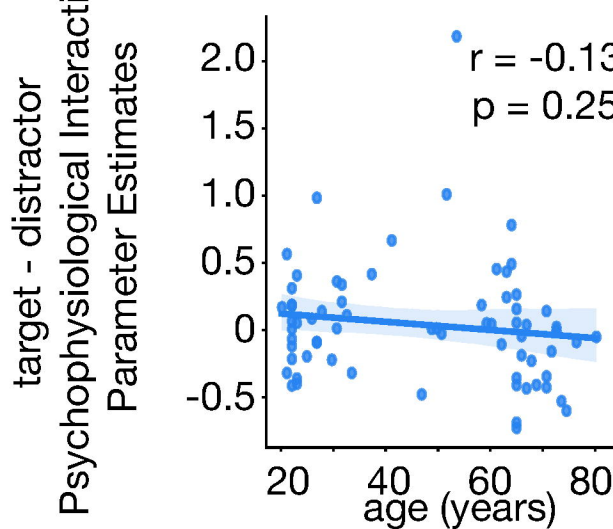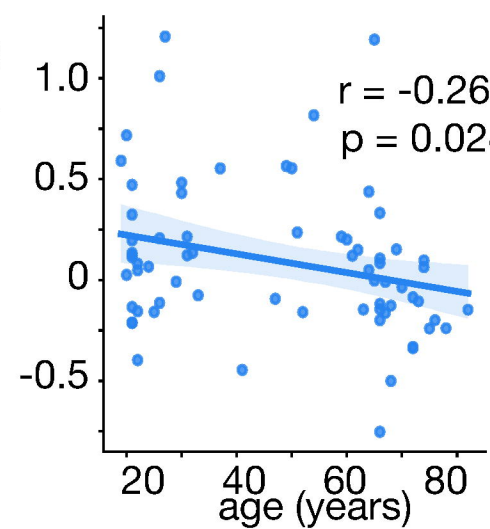

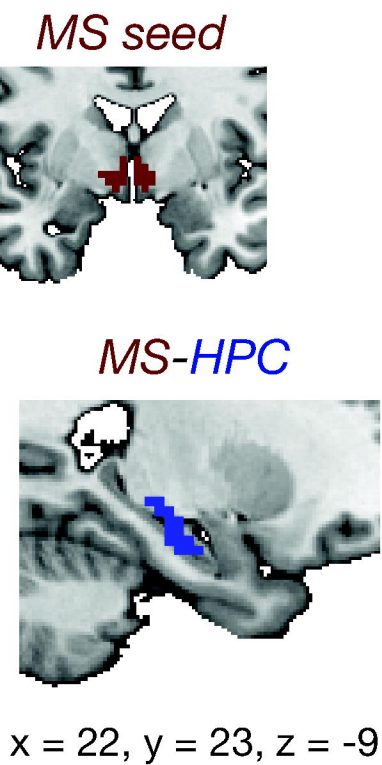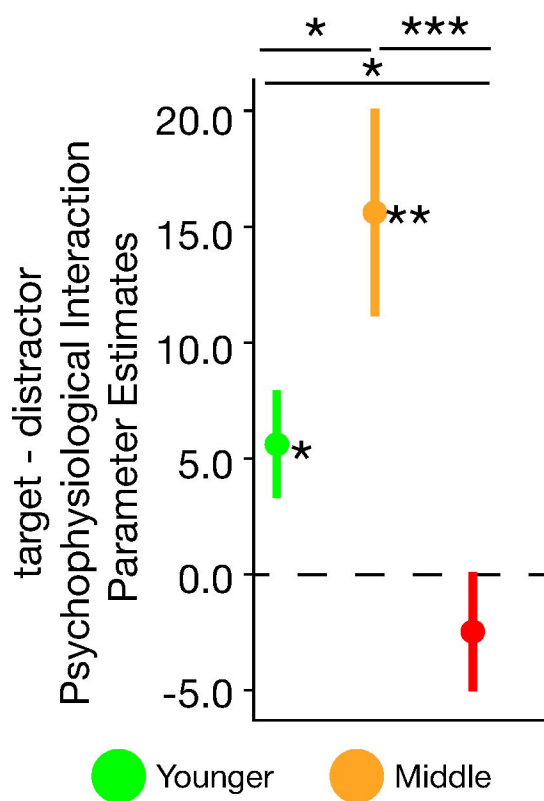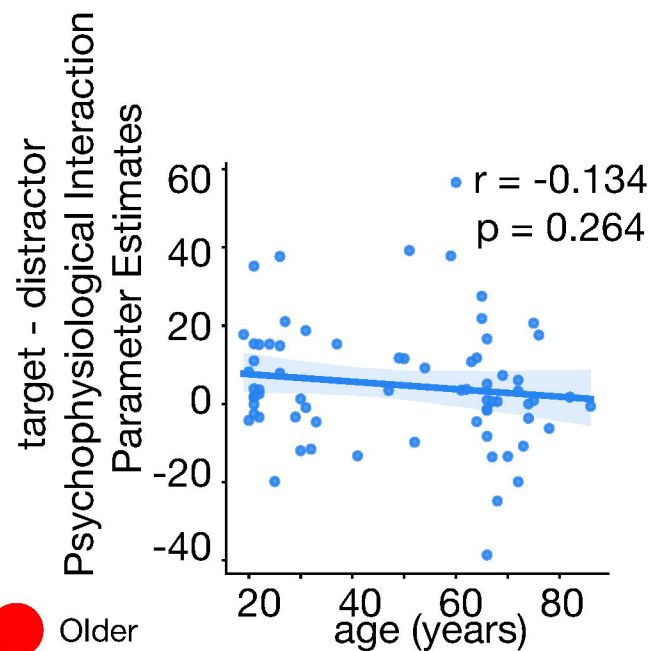

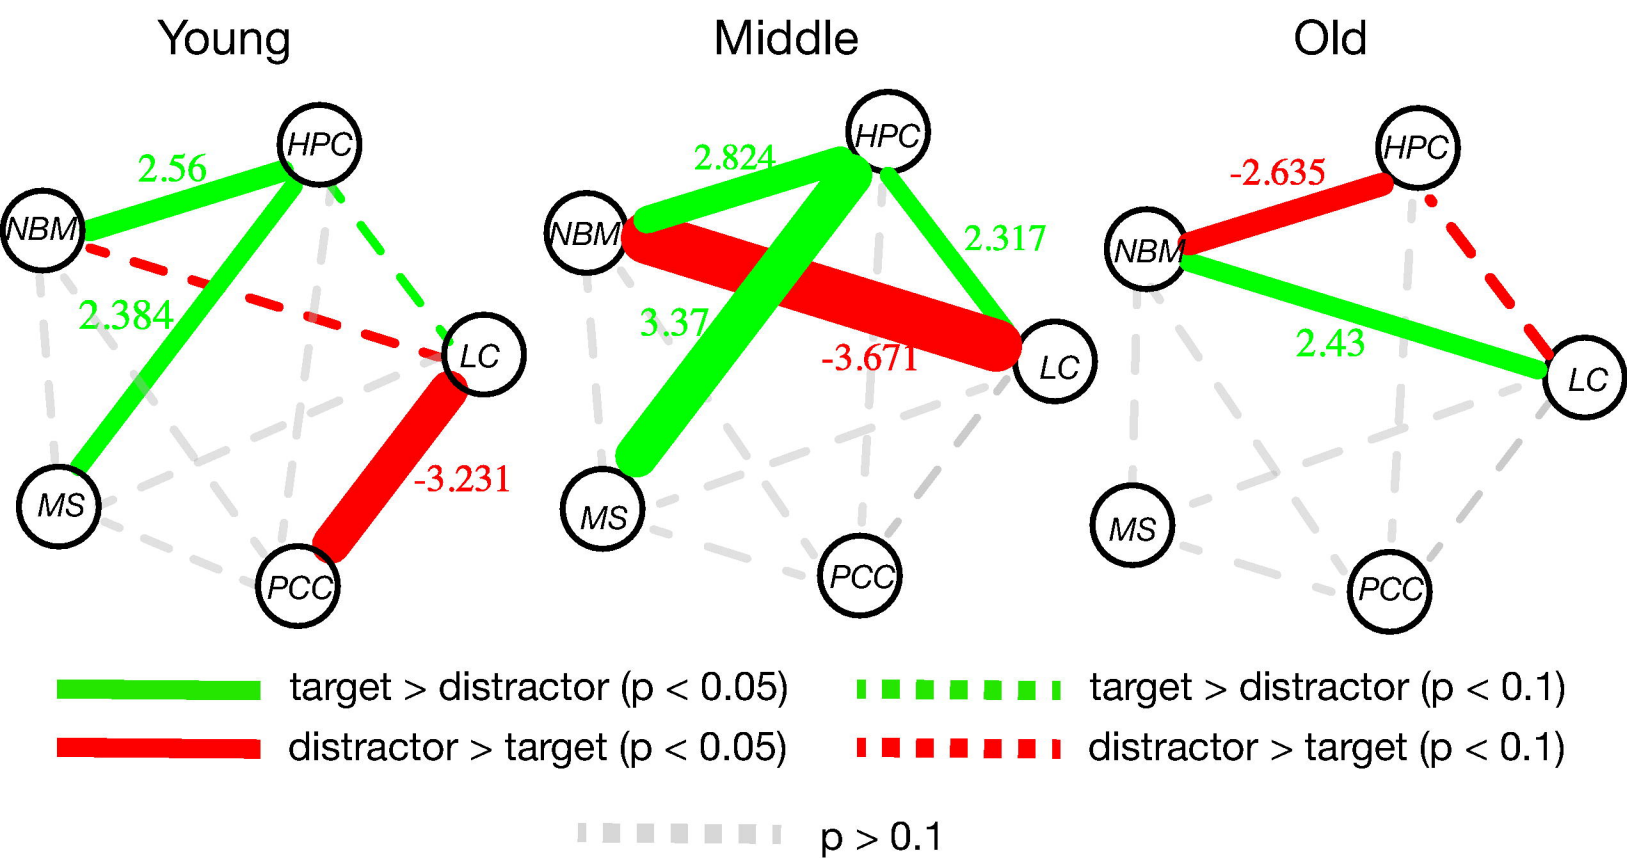

Source: https://www.biorxiv.org/content/10.1101/2023.09.29.560190v1.full.pdf
